# Supplementary material
Source: PubMed Central journal article supplement (PMC4155601)

Supplementary Figure 1. ADNP expression in various brain tissue across various timepoints in Allen Institute BrainSpan RNA-seq data. This dataset includes post-mortem samples of 16 brain regions ranging from fetus age eight post-conception weeks to adult age 40 years (n = 524). The data was normalized to RPKM (reads per kilobase per million) and a log base 2 transformation [ $\log(\text{RPKM} + 1)$ ]. ADNP expression was significantly greater in fetal compared to non-fetal brains ( $p < 0.001$ , t-test). There is a 3.16-fold increase in ADNP fetal expression and a 68.3% decrease in expression in non-fetal brains. pcw=weeks post-conception, mos=postnatal months, yrs=postnatal years.

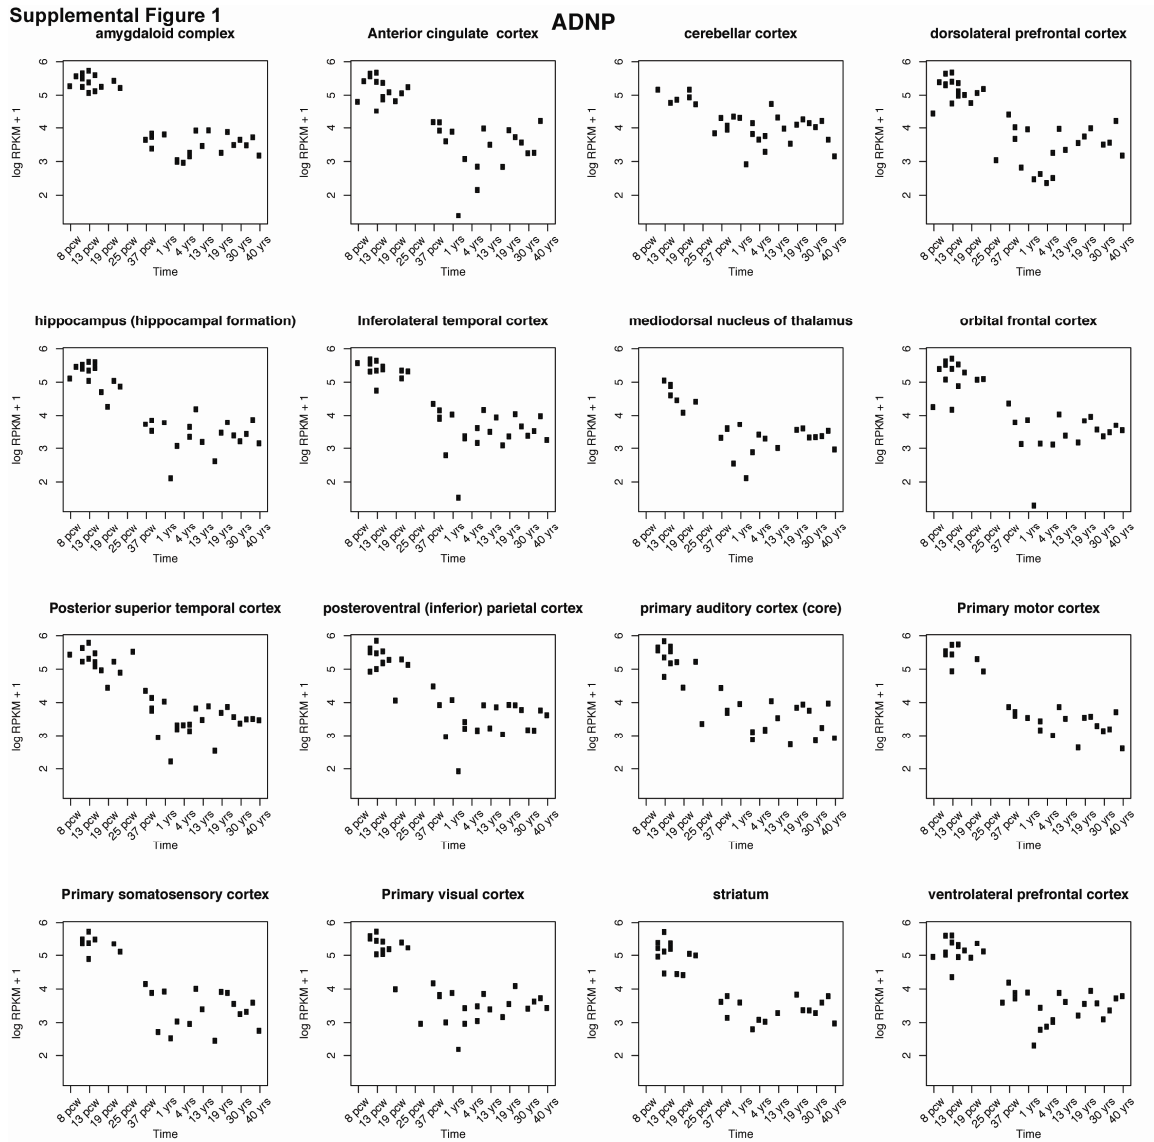

Supplement: jmedgenet-2014-102444-s1.pdf [file jmedgenet-2014-102444-s1.pdf]
