# Supplementary material
Source: PubMed Central journal article supplement (PMC4155601)
Supplement: jmedgenet-2014-102444-s3.pdf [file jmedgenet-2014-102444-s3.pdf]

**Table S2**

| Ensembl ID      | Gene symbol | Entrez ID | Correlation |
|-----------------|-------------|-----------|-------------|
| ENSG00000117139 | KDM5B       | 10765     | 0.9561      |
| ENSG00000181827 | RFX7        | 64864     | 0.9536      |
| ENSG00000163939 | PBRM1       | 55193     | 0.9527      |
| ENSG00000143702 | CEP170      | 9859      | 0.9525      |
| ENSG00000178163 | ZNF518B     | 85460     | 0.9525      |
| ENSG00000106346 | USP42       | 84132     | 0.9517      |
| ENSG00000138439 | FAM117B     | 150864    | 0.9513      |
| ENSG00000159579 | RSPRY1      | 89970     | 0.9472      |
| ENSG00000155592 | ZKSCAN2     | 342357    | 0.9463      |
| ENSG00000100426 | ZBED4       | 9889      | 0.9444      |
| ENSG00000134313 | KIDINS220   | 57498     | 0.9443      |
| ENSG00000197024 | ZNF398      | 57541     | 0.9434      |
| ENSG00000196632 | WNK3        | 65267     | 0.9433      |
| ENSG00000077097 | TOP2B       | 7155      | 0.9432      |
| ENSG00000198824 | CHAMP1      | 283489    | 0.9432      |
| ENSG00000160208 | RRP1B       | 23076     | 0.9430      |
| ENSG00000110066 | SUV420H1    | 51111     | 0.9429      |
| ENSG00000011007 | TCEB3       | 6924      | 0.9418      |
| ENSG00000089902 | RCOR1       | 23186     | 0.9415      |
| ENSG00000175087 | PDIK1L      | 149420    | 0.9412      |
| ENSG00000243943 | ZNF512      | 84450     | 0.9411      |
| ENSG00000089094 | KDM2B       | 84678     | 0.9409      |
| ENSG00000187607 | ZNF286A     | 57335     | 0.9404      |
| ENSG00000162613 | FUBP1       | 8880      | 0.9398      |
| ENSG00000183309 | ZNF623      | 9831      | 0.9397      |
| ENSG00000103160 | HSDL1       | 83693     | 0.9388      |
| ENSG00000169118 | CSNK1G1     | 53944     | 0.9379      |
| ENSG00000102974 | CTCF        | 10664     | 0.9377      |
| ENSG00000118263 | KLF7        | 8609      | 0.9374      |
| ENSG00000066135 | KDM4A       | 9682      | 0.9372      |
| ENSG00000120616 | EPC1        | 80314     | 0.9370      |
| ENSG00000124571 | XPO5        | 57510     | 0.9367      |
| ENSG00000163026 | C2orf44     | 80304     | 0.9365      |
| ENSG00000152443 | ZNF776      | 284309    | 0.9358      |
| ENSG00000144233 | AMMECR1L    | 83607     | 0.9346      |
| ENSG00000112182 | BACH2       | 60468     | 0.9341      |
| ENSG00000170558 | CDH2        | 1000      | 0.9331      |
| ENSG00000103194 | USP10       | 9100      | 0.9331      |
| ENSG00000172939 | OXSRI       | 9943      | 0.9316      |
| ENSG00000188994 | ZNF292      | 23036     | 0.9314      |
| ENSG00000125686 | MED1        | 5469      | 0.9313      |
| ENSG00000141424 | SLC39A6     | 25800     | 0.9312      |
| ENSG00000181007 | ZFP82       | 284406    | 0.9306      |
| ENSG00000171681 | ATF7IP      | 55729     | 0.9304      |
| ENSG00000163214 | DHX57       | 90957     | 0.9298      |
| ENSG00000198040 | ZNF84       | 7637      | 0.9290      |
| ENSG00000131023 | LATS1       | 9113      | 0.9289      |

|                 |           |        |        |
|-----------------|-----------|--------|--------|
| ENSG00000163104 | SMARCAD1  | 56916  | 0.9286 |
| ENSG00000122779 | TRIM24    | 8805   | 0.9284 |
| ENSG00000158636 | C11orf30  | 56946  | 0.9282 |
| ENSG00000100281 | HMGXB4    | 10042  | 0.9282 |
| ENSG00000004487 | KDM1A     | 23028  | 0.9280 |
| ENSG00000121406 | ZNF549    | 256051 | 0.9279 |
| ENSG00000213079 | SCAF8     | 22828  | 0.9277 |
| ENSG00000151458 | ANKRD50   | 57182  | 0.9275 |
| ENSG00000105866 | SP4       | 6671   | 0.9272 |
| ENSG00000121774 | KHDRBS1   | 10657  | 0.9271 |
| ENSG00000171456 | ASXL1     | 171023 | 0.9268 |
| ENSG00000164091 | WDR82     | 80335  | 0.9266 |
| ENSG00000143079 | CTTNBP2NL | 55917  | 0.9263 |
| ENSG00000113300 | CNOT6     | 57472  | 0.9263 |
| ENSG00000011258 | MBTD1     | 54799  | 0.9260 |
| ENSG00000125944 | HNRNPR    | 10236  | 0.9252 |
| ENSG00000127483 | HP1BP3    | 50809  | 0.9251 |
| ENSG00000204611 | ZNF616    | 90317  | 0.9248 |
| ENSG00000244462 | RBM12     | 10137  | 0.9245 |
| ENSG00000143061 | IGSF3     | 3321   | 0.9242 |
| ENSG00000088930 | XRN2      | 22803  | 0.9242 |
| ENSG00000085721 | RRN3      | 54700  | 0.9242 |
| ENSG00000185219 | ZNF445    | 353274 | 0.9240 |
| ENSG00000147180 | ZNF711    | 7552   | 0.9237 |
| ENSG00000198553 | KCNRG     | 283518 | 0.9236 |
| ENSG00000242852 | ZNF709    | 163051 | 0.9235 |
| ENSG00000177932 | ZNF354C   | 30832  | 0.9235 |
| ENSG00000079387 | SENP1     | 29843  | 0.9232 |
| ENSG00000179837 | RBM15B    | 29890  | 0.9231 |
| ENSG00000204178 | TMEM57    | 55219  | 0.9223 |
| ENSG00000025293 | PHF20     | 51230  | 0.9216 |
| ENSG00000184675 | FAM123B   | 139285 | 0.9216 |
| ENSG00000109685 | WHSC1     | 7468   | 0.9216 |
| ENSG00000188636 | LDOC1L    | 84247  | 0.9215 |
| ENSG00000198492 | YTHDF2    | 51441  | 0.9215 |
| ENSG00000213799 | ZNF845    | 91664  | 0.9214 |
| ENSG00000198182 | ZNF607    | 84775  | 0.9213 |
| ENSG00000171843 | MLLT3     | 4300   | 0.9211 |
| ENSG00000131845 | ZNF304    | 57343  | 0.9209 |
| ENSG00000116128 | BCL9      | 607    | 0.9203 |
| ENSG00000186448 | ZNF197    | 10168  | 0.9201 |
| ENSG00000117000 | RLF       | 6018   | 0.9200 |
| ENSG00000130396 | MLLT4     | 4301   | 0.9199 |
| ENSG00000204519 | ZNF551    | 90233  | 0.9198 |
| ENSG00000177733 | HNRNPA0   | 10949  | 0.9196 |
| ENSG00000074054 | CLASP1    | 23332  | 0.9192 |
| ENSG00000162415 | ZSWIM5    | 57643  | 0.9188 |
| ENSG00000107341 | UBE2R2    | 54926  | 0.9188 |
| ENSG00000135999 | EPC2      | 26122  | 0.9187 |

|                 |          |        |        |
|-----------------|----------|--------|--------|
| ENSG00000130803 | ZNF317   | 57693  | 0.9187 |
| ENSG00000136485 | DCAF7    | 10238  | 0.9185 |
| ENSG00000037749 | MFAP3    | 4238   | 0.9181 |
| ENSG00000145041 | VPRBP    | 9730   | 0.9180 |
| ENSG00000124459 | ZNF45    | 7596   | 0.9179 |
| ENSG00000168795 | ZBTB5    | 9925   | 0.9179 |
| ENSG00000125630 | POLR1B   | 84172  | 0.9177 |
| ENSG00000135387 | CAPRIN1  | 4076   | 0.9176 |
| ENSG00000186300 | ZNF555   | 148254 | 0.9161 |
| ENSG00000110218 | PANX1    | 24145  | 0.9157 |
| ENSG00000156531 | PHF6     | 84295  | 0.9156 |
| ENSG00000177125 | ZBTB34   | 403341 | 0.9156 |
| ENSG00000136381 | IREB2    | 3658   | 0.9156 |
| ENSG00000204977 | TRIM13   | 10206  | 0.9151 |
| ENSG00000073711 | PPP2R3A  | 5523   | 0.9150 |
| ENSG00000137574 | TGS1     | 96764  | 0.9143 |
| ENSG00000135747 | ZNF670   | 93474  | 0.9141 |
| ENSG00000101266 | CSNK2A1  | 1457   | 0.9134 |
| ENSG00000140598 | EFTUD1   | 79631  | 0.9129 |
| ENSG00000139990 | DCAF5    | 8816   | 0.9129 |
| ENSG00000196470 | SIAH1    | 6477   | 0.9129 |
| ENSG00000168246 | UBTD2    | 92181  | 0.9127 |
| ENSG00000166261 | ZNF202   | 7753   | 0.9127 |
| ENSG00000205268 | PDE7A    | 5150   | 0.9126 |
| ENSG00000114302 | PRKAR2A  | 5576   | 0.9126 |
| ENSG00000213762 | ZNF134   | 7693   | 0.9126 |
| ENSG00000152217 | SETBP1   | 26040  | 0.9126 |
| ENSG00000164244 | PRRC1    | 133619 | 0.9125 |
| ENSG00000197128 | ZNF772   | 400720 | 0.9124 |
| ENSG00000196150 | ZNF250   | 58500  | 0.9123 |
| ENSG00000196867 | ZFP28    | 140612 | 0.9122 |
| ENSG00000101193 | C20orf11 | 54994  | 0.9121 |
| ENSG00000184402 | SS18L1   | 26039  | 0.9120 |
| ENSG00000130559 | CAMSAP1  | 157922 | 0.9119 |
| ENSG00000143324 | XPR1     | 9213   | 0.9119 |
| ENSG00000092201 | SUPT16H  | 11198  | 0.9117 |
| ENSG00000147548 | WHSC1L1  | 54904  | 0.9117 |
| ENSG00000156853 | ZNF689   | 115509 | 0.9116 |
| ENSG00000110321 | EIF4G2   | 1982   | 0.9113 |
| ENSG00000174579 | MSL2     | 55167  | 0.9110 |
| ENSG00000135829 | DHX9     | 1660   | 0.9109 |
| ENSG00000176624 | MEX3C    | 51320  | 0.9108 |
| ENSG00000132436 | FIGNL1   | 63979  | 0.9107 |
| ENSG00000167785 | ZNF558   | 148156 | 0.9107 |
| ENSG00000176371 | ZSCAN2   | 54993  | 0.9102 |
| ENSG00000159131 | GART     | 2618   | 0.9102 |
| ENSG00000189091 | SF3B3    | 23450  | 0.9101 |
| ENSG00000179409 | GEMIN4   | 50628  | 0.9100 |
| ENSG00000113569 | NUP155   | 9631   | 0.9099 |

|                 |         |        |        |
|-----------------|---------|--------|--------|
| ENSG00000162419 | GMEB1   | 10691  | 0.9098 |
| ENSG00000109171 | SLAIN2  | 57606  | 0.9092 |
| ENSG00000137942 | FNBP1L  | 54874  | 0.9090 |
| ENSG00000110987 | BCL7A   | 605    | 0.9090 |
| ENSG00000136709 | WDR33   | 55339  | 0.9086 |
| ENSG0000018699  | TTC27   | 55622  | 0.9084 |
| ENSG00000160062 | ZBTB8A  | 653121 | 0.9078 |
| ENSG00000143494 | VASH2   | 79805  | 0.9076 |
| ENSG00000171649 | ZIK1    | 284307 | 0.9075 |
| ENSG00000115421 | PAPOLG  | 64895  | 0.9073 |
| ENSG00000124214 | STAU1   | 6780   | 0.9071 |
| ENSG00000065183 | WDR3    | 10885  | 0.9071 |
| ENSG00000160199 | PKNOX1  | 5316   | 0.9069 |
| ENSG00000179151 | EDC3    | 80153  | 0.9063 |
| ENSG00000124789 | NUP153  | 9972   | 0.9061 |
| ENSG00000132155 | RAF1    | 5894   | 0.9059 |
| ENSG00000213551 | DNAJC9  | 23234  | 0.9058 |
| ENSG00000189079 | ARID2   | 196528 | 0.9058 |
| ENSG00000066117 | SMARCD1 | 6602   | 0.9058 |
| ENSG00000030066 | NUP160  | 23279  | 0.9057 |
| ENSG00000125484 | GTF3C4  | 9329   | 0.9054 |
| ENSG00000188295 | ZNF669  | 79862  | 0.9052 |
| ENSG00000196652 | ZKSCAN5 | 23660  | 0.9051 |
| ENSG00000112685 | EXOC2   | 55770  | 0.9050 |
| ENSG00000196267 | ZNF836  | 162962 | 0.9048 |
| ENSG00000056277 | ZNF280C | 55609  | 0.9048 |
| ENSG00000147316 | MCPH1   | 79648  | 0.9044 |
| ENSG00000136866 | ZFP37   | 7539   | 0.9041 |
| ENSG00000142065 | ZFP14   | 57677  | 0.9032 |
| ENSG00000114742 | WDR48   | 57599  | 0.9031 |
| ENSG00000110880 | CORO1C  | 23603  | 0.9030 |
| ENSG00000079246 | XRCC5   | 7520   | 0.9030 |
| ENSG00000143379 | SETDB1  | 9869   | 0.9029 |
| ENSG00000198205 | ZXDA    | 7789   | 0.9029 |
| ENSG00000136891 | TEX10   | 54881  | 0.9027 |
| ENSG00000151846 | PABPC3  | 5042   | 0.9026 |
| ENSG00000158691 | ZSCAN12 | 9753   | 0.9025 |
| ENSG00000145725 | PIIP5K2 | 23262  | 0.9019 |
| ENSG00000131473 | ACLY    | 47     | 0.9019 |
| ENSG00000077279 | DCX     | 1641   | 0.9016 |
| ENSG00000129351 | ILF3    | 3609   | 0.9014 |
| ENSG00000166704 | ZNF606  | 80095  | 0.9012 |
| ENSG00000180370 | PAK2    | 5062   | 0.9006 |
| ENSG00000142556 | ZNF614  | 80110  | 0.9004 |
| ENSG00000086848 | ALG9    | 79796  | 0.9003 |
| ENSG00000081386 | ZNF510  | 22869  | 0.9002 |
| ENSG00000021574 | SPAST   | 6683   | 0.9000 |
