# Supplementary material
Source: PubMed Central journal article supplement (PMC4155601)
Supplement: jmedgenet-2014-102444-s4.pdf [file jmedgenet-2014-102444-s4.pdf]

**Table S3**

| Ensembl ID      | Gene symbol | Entrez ID | Correlation |
|-----------------|-------------|-----------|-------------|
| ENSG00000197971 | MBP         | 4155      | -0.9038     |
| ENSG00000107902 | LHPP        | 64077     | -0.8995     |
| ENSG00000160781 | PAQR6       | 79957     | -0.8984     |
| ENSG00000090581 | GNPTG       | 84572     | -0.8977     |
| ENSG00000159176 | CSRP1       | 1465      | -0.8928     |
| ENSG00000105643 | ARRDC2      | 27106     | -0.8916     |
| ENSG00000250479 | CHCHD10     | 400916    | -0.8899     |
| ENSG00000116661 | FBXO2       | 26232     | -0.8896     |
| ENSG00000021300 | PLEKHB1     | 58473     | -0.8873     |
| ENSG00000189171 | S100A13     | 6284      | -0.8864     |
| ENSG00000167641 | PPP1R14A    | 94274     | -0.8816     |
| ENSG00000160307 | S100B       | 6285      | -0.8803     |
| ENSG00000063180 | CA11        | 770       | -0.8801     |
| ENSG00000100003 | SEC14L2     | 23541     | -0.8796     |
| ENSG00000101400 | SNTA1       | 6640      | -0.8766     |
| ENSG00000120306 | C5orf32     | 84418     | -0.8761     |
|                 | TNFSF12-    |           |             |
| ENSG00000248871 | TNFSF13     | 407977    | -0.8741     |
| ENSG00000103740 | ACSBG1      | 23205     | -0.8740     |
| ENSG00000173267 | SNCG        | 6623      | -0.8722     |
| ENSG00000165795 | NDRG2       | 57447     | -0.8713     |
| ENSG00000145198 | VWA5B2      | 90113     | -0.8706     |
| ENSG00000102934 | PLLP        | 51090     | -0.8676     |
| ENSG00000198892 | SHISA4      | 149345    | -0.8657     |
| ENSG00000101439 | CST3        | 1471      | -0.8655     |
| ENSG00000176485 | PLA2G16     | 11145     | -0.8654     |
| ENSG00000109107 | ALDOC       | 230       | -0.8651     |
| ENSG00000087250 | MT3         | 4504      | -0.8650     |
| ENSG00000161955 | TNFSF13     | 8741      | -0.8639     |
| ENSG00000131097 | HIGD1B      | 51751     | -0.8631     |
| ENSG00000166091 | CMTM5       | 116173    | -0.8622     |
| ENSG00000130303 | BST2        | 684       | -0.8619     |
| ENSG00000244274 | DBNDD2      | 55861     | -0.8604     |
| ENSG00000167705 | RILP        | 83547     | -0.8592     |
| ENSG00000174939 | ASPHD1      | 253982    | -0.8565     |
| ENSG00000163517 | HDAC11      | 79885     | -0.8564     |
| ENSG00000239697 | TNFSF12     | 8742      | -0.8547     |
| ENSG00000103811 | CTSH        | 1512      | -0.8545     |
| ENSG00000160408 | ST6GALNAC6  | 30815     | -0.8535     |
| ENSG00000124615 | MOCS1       | 4337      | -0.8519     |
| ENSG00000189058 | APOD        | 347       | -0.8498     |
| ENSG00000234745 | HLA-B       | 3106      | -0.8496     |
| ENSG00000182902 | SLC25A18    | 83733     | -0.8484     |
| ENSG00000166925 | TSC22D4     | 81628     | -0.8480     |
| ENSG00000148120 | C9orf3      | 84909     | -0.8479     |
| ENSG00000129250 | KIF1C       | 10749     | -0.8472     |
| ENSG00000198835 | GJC2        | 57165     | -0.8468     |

|                 |              |           |         |
|-----------------|--------------|-----------|---------|
| ENSG00000198624 | CCDC69       | 26112     | -0.8462 |
| ENSG00000183401 | CCDC159      | 126075    | -0.8460 |
| ENSG00000109846 | CRYAB        | 1410      | -0.8452 |
| ENSG00000175482 | POLD4        | 57804     | -0.8451 |
| ENSG00000108387 | 5-Sep        | 5414      | -0.8440 |
| ENSG00000120885 | CLU          | 1191      | -0.8435 |
| ENSG00000131730 | CKMT2        | 1160      | -0.8433 |
| ENSG00000170634 | ACYP2        | 98        | -0.8427 |
| ENSG00000102760 | C13orf15     | 28984     | -0.8425 |
| ENSG00000149489 | ROM1         | 6094      | -0.8406 |
| ENSG00000091513 | TF           | 7018      | -0.8399 |
| ENSG00000244187 | TMEM141      | 85014     | -0.8398 |
| ENSG00000244607 | CCDC13       | 152206    | -0.8394 |
| ENSG00000135525 | MAP7         | 9053      | -0.8391 |
| ENSG00000078804 | TP53INP2     | 58476     | -0.8390 |
| ENSG00000161835 | GRASP        | 160622    | -0.8372 |
| ENSG00000183628 | DGCR6        | 8214      | -0.8371 |
| ENSG00000146122 | DAAM2        | 23500     | -0.8371 |
| ENSG00000158526 | TSR2         | 90121     | -0.8354 |
| ENSG00000128805 | ARHGAP22     | 58504     | -0.8353 |
| ENSG00000100399 | CHADL        | 150356    | -0.8352 |
| ENSG00000172216 | CEBPB        | 1051      | -0.8331 |
| ENSG00000139192 | TAPBPL       | 55080     | -0.8330 |
| ENSG00000180155 | LYNX1        | 66004     | -0.8327 |
| ENSG00000204592 | HLA-E        | 3133      | -0.8327 |
| ENSG00000211584 | SLC48A1      | 55652     | -0.8326 |
| ENSG00000175602 | CCDC85B      | 11007     | -0.8325 |
| ENSG00000166710 | B2M          | 567       | -0.8322 |
| ENSG00000164403 | SHROOM1      | 134549    | -0.8317 |
| ENSG00000160801 | PTH1R        | 5745      | -0.8307 |
| ENSG00000198832 | RP3-412A9.11 | 140606    | -0.8305 |
| ENSG00000172458 | IL17D        | 53342     | -0.8301 |
| ENSG00000100033 | PRODH        | 5625      | -0.8300 |
| ENSG00000135926 | TMBIM1       | 64114     | -0.8282 |
| ENSG00000245937 | CTC-228N24.3 | 644873    | -0.8277 |
| ENSG00000091428 | RAPGEF4      | 11069     | -0.8273 |
| ENSG00000114993 | RTKN         | 6242      | -0.8265 |
| ENSG00000189283 | FHIT         | 2272      | -0.8264 |
| ENSG00000125148 | MT2A         | 4502      | -0.8260 |
| ENSG00000164402 | 9-Sep        | 23176     | -0.8254 |
| ENSG00000105518 | TMEM205      | 374882    | -0.8252 |
| ENSG00000078814 | MYH7B        | 57644     | -0.8249 |
| ENSG00000130988 | RGN          | 9104      | -0.8243 |
| ENSG00000167106 | FAM102A      | 399665    | -0.8242 |
| ENSG00000134873 | CLDN10       | 9071      | -0.8241 |
| ENSG00000236830 | AP000689.8   | 100506428 | -0.8235 |
| ENSG00000240065 | PSMB9        | 5698      | -0.8229 |
| ENSG00000112561 | TFEB         | 7942      | -0.8228 |
| ENSG00000102032 | RENBP        | 5973      | -0.8228 |

|                 |          |        |         |
|-----------------|----------|--------|---------|
| ENSG00000084453 | SLCO1A2  | 6579   | -0.8228 |
| ENSG00000198121 | LPAR1    | 1902   | -0.8225 |
| ENSG00000123560 | PLP1     | 5354   | -0.8222 |
| ENSG00000175197 | DDIT3    | 1649   | -0.8221 |
| ENSG00000087076 | HSD17B14 | 51171  | -0.8215 |
| ENSG00000160685 | ZBTB7B   | 51043  | -0.8211 |
| ENSG00000148411 | NACC2    | 138151 | -0.8211 |
| ENSG00000149090 | PAMR1    | 25891  | -0.8197 |
| ENSG00000158315 | RHBDL2   | 54933  | -0.8192 |
| ENSG00000157873 | TNFRSF14 | 8764   | -0.8192 |
| ENSG00000159228 | CBR1     | 873    | -0.8192 |
| ENSG00000072952 | MRVI1    | 10335  | -0.8192 |
| ENSG00000196502 | SULT1A1  | 6817   | -0.8192 |
| ENSG00000104267 | CA2      | 760    | -0.8188 |
| ENSG00000037042 | TUBG2    | 27175  | -0.8186 |
| ENSG00000166411 | IDH3A    | 3419   | -0.8181 |
| ENSG00000012171 | SEMA3B   | 7869   | -0.8177 |
| ENSG00000182600 | C2orf82  | 389084 | -0.8177 |
| ENSG00000239382 | ALKBH6   | 84964  | -0.8171 |
| ENSG00000129538 | RNASE1   | 6035   | -0.8169 |
| ENSG00000067113 | PPAP2A   | 8611   | -0.8169 |
| ENSG00000182700 | IGIP     | 492311 | -0.8155 |
| ENSG00000127824 | TUBA4A   | 7277   | -0.8146 |
| ENSG00000130203 | APOE     | 348    | -0.8145 |
| ENSG00000161281 | COX7A1   | 1346   | -0.8144 |
| ENSG00000101335 | MYL9     | 10398  | -0.8143 |
| ENSG00000149091 | DGKZ     | 8525   | -0.8139 |
| ENSG00000126709 | IFI6     | 2537   | -0.8137 |
| ENSG00000010278 | CD9      | 928    | -0.8135 |
| ENSG00000152583 | SPARCL1  | 8404   | -0.8133 |
| ENSG00000129473 | BCL2L2   | 599    | -0.8131 |
| ENSG00000174080 | CTSF     | 8722   | -0.8117 |
| ENSG00000144040 | SFXN5    | 94097  | -0.8110 |
| ENSG00000184524 | CEND1    | 51286  | -0.8105 |
| ENSG00000100307 | CBX7     | 23492  | -0.8104 |
| ENSG00000013364 | MVP      | 9961   | -0.8101 |
| ENSG00000178980 | SEPW1    | 6415   | -0.8101 |
| ENSG00000106351 | AGFG2    | 3268   | -0.8101 |
| ENSG00000161714 | PLCD3    | 113026 | -0.8095 |
| ENSG00000042445 | RETSAT   | 54884  | -0.8085 |
| ENSG00000155324 | GRAMD3   | 65983  | -0.8083 |
| ENSG00000224877 | C17orf89 | 284184 | -0.8083 |
| ENSG00000036530 | CYP46A1  | 10858  | -0.8080 |
| ENSG00000156381 | ANKRD9   | 122416 | -0.8073 |
| ENSG00000137825 | ITPKA    | 3706   | -0.8072 |
| ENSG00000161642 | ZNF385A  | 25946  | -0.8060 |
| ENSG00000068079 | IFI35    | 3430   | -0.8059 |
| ENSG00000117691 | NENF     | 29937  | -0.8055 |
| ENSG00000080573 | COL5A3   | 50509  | -0.8052 |

|                 |         |        |         |
|-----------------|---------|--------|---------|
| ENSG00000122359 | ANXA11  | 311    | -0.8047 |
| ENSG00000184221 | OLIG1   | 116448 | -0.8043 |
| ENSG00000126860 | EVI2A   | 2123   | -0.8041 |
| ENSG00000198753 | PLXNB3  | 5365   | -0.8035 |
| ENSG00000135916 | ITM2C   | 81618  | -0.8035 |
| ENSG00000117266 | CDK18   | 5129   | -0.8033 |
| ENSG00000087842 | PIR     | 8544   | -0.8029 |
| ENSG00000100116 | GCAT    | 23464  | -0.8027 |
| ENSG00000182196 | ARL6IP4 | 51329  | -0.8025 |
| ENSG00000166033 | HTRA1   | 5654   | -0.8025 |
| ENSG00000105516 | DBP     | 1628   | -0.8022 |
| ENSG00000147576 | ADHFE1  | 137872 | -0.8017 |
| ENSG00000135929 | CYP27A1 | 1593   | -0.8014 |
| ENSG00000185043 | CIB1    | 10519  | -0.8013 |
| ENSG00000198171 | DDRGK1  | 65992  | -0.8005 |
| ENSG00000104825 | NFKBIB  | 4793   | -0.8002 |
