# Supplementary material
Source: PubMed Central journal article supplement (PMC4155601)
Supplement: jmedgenet-2014-102444-s6.pdf [file jmedgenet-2014-102444-s6.pdf]

**Table S5**

Enrichment Score: 2.05520653893013

| Term                                                             | PValue      | Fold<br>Enrichment | Bonferroni  | Benjamini   | FDR         |
|------------------------------------------------------------------|-------------|--------------------|-------------|-------------|-------------|
| GO:0019725~cellular homeostasis                                  | 2.43E-05    | 3.922978773        | 0.025459257 | 0.025459257 | 0.03865368  |
| GO:0006873~cellular ion homeostasis                              | 5.13E-05    | 4.236257648        | 0.053053764 | 0.026888374 | 0.081688971 |
| GO:0055082~cellular chemical homeostasis                         | 5.98E-05    | 4.169369369        | 0.061564435 | 0.020957632 | 0.095211386 |
| GO:0050801~ion homeostasis                                       | 1.20E-04    | 3.873741712        | 0.119986644 | 0.031449397 | 0.191433421 |
| GO:0042552~myelination                                           | 2.47E-04    | 16.03603604        | 0.230648636 | 0.05109017  | 0.392313208 |
| GO:0008366~axon ensheathment                                     | 3.65E-04    | 14.50879451        | 0.321463586 | 0.053895686 | 0.579703918 |
| GO:0007272~ensheathment of neurons                               | 3.65E-04    | 14.50879451        | 0.321463586 | 0.053895686 | 0.579703918 |
| GO:0043218~compact myelin                                        | 4.51E-04    | 84.83628319        | 0.086337655 | 0.086337655 | 0.564274133 |
| GO:0048878~chemical homeostasis                                  | 9.18E-04    | 3.094453829        | 0.622745017 | 0.114722609 | 1.4507822   |
| GO:0019228~regulation of action potential in neuron              | 9.57E-04    | 11.28461795        | 0.638356043 | 0.106858777 | 1.513198461 |
| GO:0001508~regulation of action potential                        | 0.002259673 | 8.961314255        | 0.909507496 | 0.196202594 | 3.537569297 |
| GO:0042592~homeostatic process                                   | 0.003032565 | 2.434231835        | 0.960263194 | 0.235696093 | 4.720384985 |
| GO:0042391~regulation of membrane potential                      | 0.004722187 | 5.457039129        | 0.9934405   | 0.284749697 | 7.258969351 |
| GO:0043209~myelin sheath                                         | 0.006464551 | 24.23893805        | 0.726678723 | 0.35103021  | 7.807323496 |
| GO:0030003~cellular cation homeostasis                           | 0.017490709 | 3.358728808        | 0.999999993 | 0.667901423 | 24.49192749 |
| GO:0055080~cation homeostasis                                    | 0.029210562 | 2.982926983        | 1           | 0.760948925 | 37.6236393  |
| GO:0030005~cellular di-, tri-valent inorganic cation homeostasis | 0.037761529 | 3.221335873        | 1           | 0.830917913 | 45.81899971 |
| GO:0055066~di-, tri-valent inorganic cation homeostasis          | 0.045424144 | 3.05959516         | 1           | 0.861213338 | 52.29481365 |
| GO:0006875~cellular metal ion homeostasis                        | 0.075750771 | 3.109027395        | 1           | 0.94960014  | 71.46787402 |
| GO:0055065~metal ion homeostasis                                 | 0.086014806 | 2.972533509        | 1           | 0.949456141 | 76.11533618 |
| GO:0051336~regulation of hydrolase activity                      | 0.139911289 | 2.169861256        | 1           | 0.989675831 | 90.92442057 |
| GO:0019226~transmission of nerve impulse                         | 0.156357284 | 2.089266409        | 1           | 0.991363732 | 93.32604578 |
| GO:0006874~cellular calcium ion homeostasis                      | 0.186732685 | 2.663909811        | 1           | 0.993186681 | 96.27745303 |
| GO:0055074~calcium ion homeostasis                               | 0.197036228 | 2.593061146        | 1           | 0.992976816 | 96.96134967 |
| GO:0043085~positive regulation of catalytic activity             | 0.248403167 | 1.640609841        | 1           | 0.994142275 | 98.9393363  |
| GO:0044093~positive regulation of molecular function             | 0.341718263 | 1.455831258        | 1           | 0.996870335 | 99.87148146 |
| GO:0051345~positive regulation of hydrolase activity             | 0.428818501 | 2.042578892        | 1           | 0.998213244 | 99.98658338 |
| GO:0007268~synaptic transmission                                 | 0.701197799 | 1.226918193        | 1           | 0.999817699 | 99.99999956 |
| GO:0050877~neurological system process                           | 0.872256558 | 0.805777679        | 1           | 0.999998367 | 100         |

Enrichment Score: 1.6774356195641622

| Term                                                                              | PValue   | Fold<br>Enrichment | Bonferroni  | Benjamini   | FDR         |
|-----------------------------------------------------------------------------------|----------|--------------------|-------------|-------------|-------------|
| GO:0002474~antigen processing and presentation of peptide antigen via MHC class I | 3.27E-04 | 28.67620562        | 0.293709198 | 0.056307308 | 0.519935621 |

|                                                                           |             |             |             |             |             |
|---------------------------------------------------------------------------|-------------|-------------|-------------|-------------|-------------|
| GO:0048002~antigen processing and presentation of peptide antigen mhc i   | 0.00147787  | 17.41055341 | 0.792091774 | 0.145352223 | 2.327125998 |
| domain:Ig-like C1-type                                                    | 0.002643424 | 37.96381579 | 0.513229958 | 0.513229958 | 3.424202808 |
| GO:0019882~antigen processing and presentation                            | 0.003855531 | 12.57434211 | 0.853378699 | 0.61708839  | 5.40650517  |
| immune response                                                           | 0.004646526 | 7.341799631 | 0.99288899  | 0.297629083 | 7.146661526 |
| heterodimer                                                               | 0.008593187 | 3.954564145 | 0.90438709  | 0.690786627 | 10.7387509  |
| SM00407:IGc1                                                              | 0.008851814 | 6.143012264 | 0.910937142 | 0.453708861 | 11.04477624 |
| IPR003597:Immunoglobulin C1-set                                           | 0.009243444 | 9.051844467 | 0.477980351 | 0.477980351 | 9.163282854 |
| GO:0042612~MHC class I protein complex                                    | 0.018487766 | 7.101023018 | 0.997352487 | 0.94854601  | 22.24283252 |
| IPR003006:Immunoglobulin/major histocompatibility complex, conserved site | 0.02479911  | 12.11946903 | 0.993411026 | 0.633761865 | 27.00288516 |
| GO:0042611~MHC protein complex                                            | 0.034967396 | 5.550224888 | 0.999987856 | 0.940967942 | 38.11297818 |
| hsa04612:Antigen processing and presentation                              | 0.089019731 | 5.953423381 | 0.999999992 | 0.666085754 | 68.91958152 |
| IPR007110:Immunoglobulin-like                                             | 0.178339897 | 3.829066265 | 0.999999279 | 0.99103371  | 87.05651982 |
| IPR013783:Immunoglobulin-like fold                                        | 0.593744737 | 1.204764384 | 1           | 0.999999999 | 99.99946796 |
| Immunoglobulin domain                                                     | 0.67108928  | 1.091477317 | 1           | 1           | 99.99996914 |
|                                                                           | 0.886851993 | 0.807740761 | 1           | 0.999789747 | 100         |

Enrichment Score: 1.422597126082399

| Term                                 | PValue      | Fold Enrichment | Bonferroni  | Benjamini   | FDR         |
|--------------------------------------|-------------|-----------------|-------------|-------------|-------------|
| GO:0006706~steroid catabolic process | 0.012439646 | 17.41055341     | 0.999998315 | 0.564325584 | 18.0689046  |
| GO:0016042~lipid catabolic process   | 0.052581996 | 3.522366297     | 1           | 0.88989274  | 57.6821684  |
| GO:0008202~steroid metabolic process | 0.082520822 | 3.016680046     | 1           | 0.957317715 | 74.61946123 |

Enrichment Score: 1.3734763560145584

| Term                                     | PValue      | Fold Enrichment | Bonferroni  | Benjamini   | FDR         |
|------------------------------------------|-------------|-----------------|-------------|-------------|-------------|
| SM00280:KAZAL                            | 0.034690381 | 10.0357406      | 0.915537413 | 0.709375522 | 30.60746334 |
| domain:Kazal-like                        | 0.039766725 | 9.430756579     | 0.999999998 | 0.993538827 | 44.22588955 |
| IPR002350:Proteinase inhibitor I1, Kazal | 0.054934104 | 7.872873346     | 0.999999984 | 0.949940001 | 53.31395407 |

Enrichment Score: 1.094223868313612

| Term                                 | PValue      | Fold Enrichment | Bonferroni  | Benjamini   | FDR         |
|--------------------------------------|-------------|-----------------|-------------|-------------|-------------|
| steroid metabolism                   | 0.05460337  | 7.909128289     | 0.999999767 | 0.750539402 | 52.24678483 |
| GO:0008202~steroid metabolic process | 0.082520822 | 3.016680046     | 1           | 0.957317715 | 74.61946123 |
| lipid metabolism                     | 0.115756504 | 3.352213315     | 1           | 0.844173379 | 80.19775816 |

Enrichment Score: 0.997470634770057

| Term | PValue | Fold Enrichment | Bonferroni | Benjamini | FDR |
|------|--------|-----------------|------------|-----------|-----|
|------|--------|-----------------|------------|-----------|-----|

|                                      |             |             |             |             |             |
|--------------------------------------|-------------|-------------|-------------|-------------|-------------|
| GO:0015630~microtubule cytoskeleton  | 0.022155154 | 2.266421652 | 0.988676251 | 0.673789785 | 24.48314254 |
| microtubule                          | 0.108940683 | 2.739092048 | 1           | 0.859261646 | 78.09162005 |
| GO:0044430~cytoskeletal part         | 0.128734802 | 1.544638209 | 1           | 0.747940152 | 82.22347776 |
| GO:0007017~microtubule-based process | 0.150950395 | 2.408574582 | 1           | 0.990875966 | 92.61151135 |
| GO:0005874~microtubule               | 0.219508703 | 2.064143143 | 1           | 0.84051259  | 95.5234329  |

Enrichment Score: 0.9827211085507533

| Term                                                          | PValue      | Fold Enrichment | Bonferroni  | Benjamini   | FDR         |
|---------------------------------------------------------------|-------------|-----------------|-------------|-------------|-------------|
| oxidoreductase                                                | 0.033448787 | 2.251709122     | 0.999904244 | 0.685481941 | 36.09838067 |
| Secondary metabolites biosynthesis, transport, and catabolism | 0.076953622 | 6               | 0.429093934 | 0.429093934 | 33.82174085 |
| nadp                                                          | 0.124408406 | 3.24477058      | 1           | 0.835827076 | 82.60182777 |
| GO:0055114~oxidation reduction                                | 0.14880303  | 1.716533435     | 1           | 0.991372459 | 92.30832673 |
| GO:0009055~electron carrier activity                          | 0.256049255 | 2.259484859     | 1           | 0.999401689 | 97.98032133 |

Enrichment Score: 0.9643760199606757

| Term                            | PValue      | Fold Enrichment | Bonferroni | Benjamini   | FDR         |
|---------------------------------|-------------|-----------------|------------|-------------|-------------|
| iron                            | 0.025176738 | 3.108148661     | 0.99902761 | 0.628728605 | 28.51266864 |
| GO:0005506~iron ion binding     | 0.035802532 | 2.837194056     | 0.99995736 | 0.99995736  | 38.18386548 |
| heme                            | 0.245668498 | 3.137505437     | 1          | 0.93534462  | 97.55473392 |
| GO:0020037~heme binding         | 0.249364063 | 3.095120788     | 1          | 0.999635372 | 97.72731459 |
| GO:0046906~tetrapyrrole binding | 0.272912452 | 2.903175313     | 1          | 0.998132413 | 98.50750363 |

Enrichment Score: 0.9529608825552933

| Term                                    | PValue      | Fold Enrichment | Bonferroni  | Benjamini   | FDR         |
|-----------------------------------------|-------------|-----------------|-------------|-------------|-------------|
| GO:0031967~organelle envelope           | 0.04525387  | 2.006879817     | 0.999905031 | 0.733701473 | 44.03510045 |
| GO:0031975~envelope                     | 0.046078933 | 2.000426828     | 0.999920111 | 0.692524157 | 44.63827132 |
| GO:0005743~mitochondrial inner membrane | 0.052223996 | 2.587599051     | 0.999978065 | 0.69636692  | 48.94595328 |
| GO:0031090~organelle membrane           | 0.05510773  | 1.651314515     | 0.999988075 | 0.678155628 | 50.85916168 |
| GO:0031966~mitochondrial membrane       | 0.057889259 | 2.296752167     | 0.999993387 | 0.661836709 | 52.64184028 |
| GO:0019866~organelle inner membrane     | 0.069138326 | 2.406703069     | 0.999999402 | 0.667868557 | 59.26126348 |
| GO:0005740~mitochondrial envelope       | 0.075067963 | 2.159714449     | 0.999999833 | 0.67201453  | 62.39706864 |
| transit peptide:Mitochondrion           | 0.077581033 | 2.154062887     | 1           | 0.998755806 | 68.71189696 |
| transit peptide                         | 0.08171978  | 2.126824414     | 1           | 0.809163428 | 67.44368997 |
| mitochondrion                           | 0.119706799 | 1.67308483      | 1           | 0.838825339 | 81.33112491 |
| GO:0044429~mitochondrial part           | 0.150825708 | 1.710983863     | 1           | 0.773787443 | 87.1160551  |
| GO:0005739~mitochondrion                | 0.15519041  | 1.456863495     | 1           | 0.769261372 | 87.92192257 |
| mitochondrion inner membrane            | 0.448304308 | 1.967037088     | 1           | 0.982479067 | 99.96019501 |
| GO:0031980~mitochondrial lumen          | 0.594606831 | 1.494912479     | 1           | 0.964706846 | 99.99878343 |

|                                                |             |                    |            |             |             |
|------------------------------------------------|-------------|--------------------|------------|-------------|-------------|
| GO:0005759~mitochondrial matrix                | 0.594606831 | 1.494912479        | 1          | 0.964706846 | 99.99878343 |
| Enrichment Score: 0.9372789408800029           |             |                    |            |             |             |
| Term                                           | PValue      | Fold<br>Enrichment | Bonferroni | Benjamini   | FDR         |
| GO:0000302~response to reactive oxygen species | 0.023139848 | 6.49993994         | 1          | 0.748747001 | 31.11521524 |
| GO:0010035~response to inorganic substance     | 0.025916446 | 3.567040211        | 1          | 0.769543897 | 34.16721209 |
| GO:0006979~response to oxidative stress        | 0.044751832 | 3.715666886        | 1          | 0.868131083 | 51.75707056 |
| GO:0007568~aging                               | 0.060463982 | 4.431777232        | 1          | 0.913980868 | 62.95245262 |
| GO:0033554~cellular response to stress         | 0.490048042 | 1.291949193        | 1          | 0.998586087 | 99.99779391 |
| GO:0010033~response to organic substance       | 0.536459289 | 1.183241494        | 1          | 0.999068666 | 99.99951712 |
| GO:0009719~response to endogenous stimulus     | 0.644211486 | 1.203692581        | 1          | 0.999687149 | 99.99999285 |
